# Supplementary material for: Myeloid-specific SIRT1 deletion exacerbates airway inflammatory response in a mouse model of allergic asthma
Source: Aging (Albany NY). 2021 Jun 7;13(11):15479–90. doi: 10.18632/aging.203104 (PMC8221322; doi:10.18632/aging.203104)
Supplement: Supplementary Figures [file aging-13-203104-s001.pdf]

## SUPPLEMENTARY FIGURES

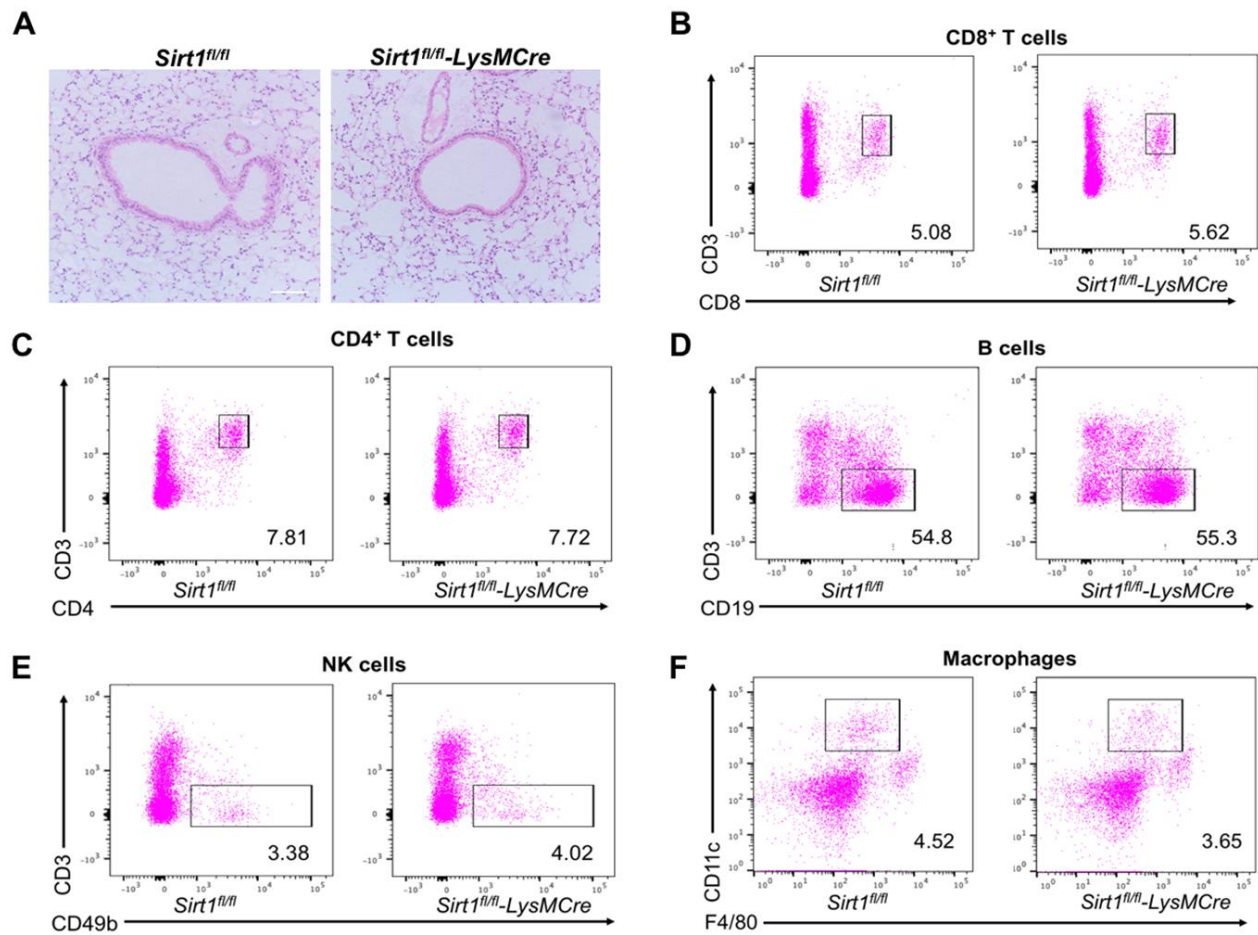

**Supplementary Figure 1. *Sirt1* deficiency has no influence on cell development and differentiation *in vivo*.** (A) The lung sections were histologic analyzed using HE staining to visualize inflammatory cell recruitment (Scale bar, 100  $\mu$ m). (B–F) The CD45<sup>+</sup>CD3<sup>+</sup> cells in the splenocytes of *Sirt1<sup>fl/fl</sup>* and *Sirt1<sup>fl/fl</sup>-LysMCre* mice were gated for further analysis of CD8<sup>+</sup> T cells, CD4<sup>+</sup> T cells, B cells, and NK cells. The CD45<sup>+</sup>CD11c<sup>+</sup>F4/80<sup>+</sup> cells in the splenocytes of *Sirt1<sup>fl/fl</sup>* and *Sirt1<sup>fl/fl</sup>-LysMCre* mice were gated for macrophages. Representative flow cytometer of CD8<sup>+</sup> T cells, CD4<sup>+</sup> T cells, B cells, and NK cells, and macrophages expression are shown.

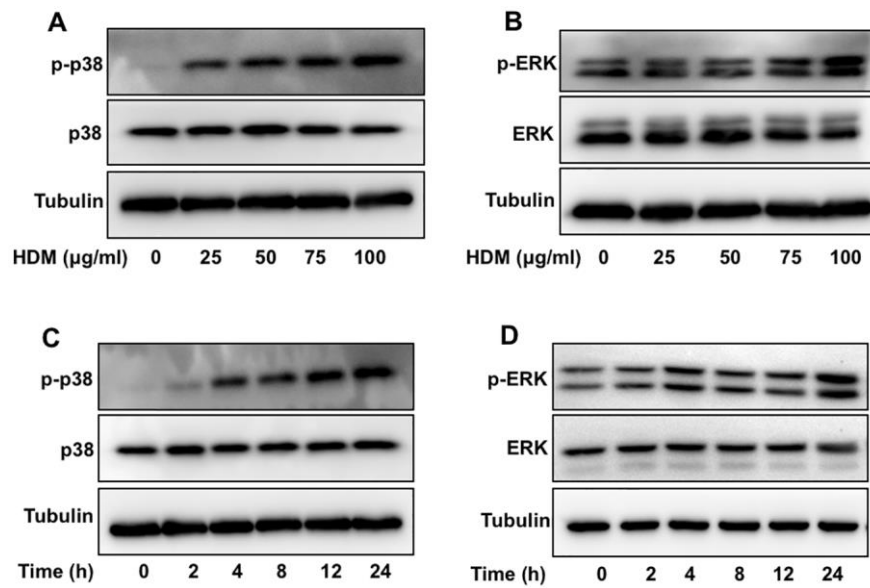

**Supplementary Figure 2. HDM-induced inflammation response in BMDMs via MAPK pathways.** BMDMs were treated with HDM, and the protein levels of MAPK pathways were measured by Western blot. (A, B) HDM activated p38 and ERK phosphorylation in a dose-dependent manner (0, 25, 50, 75 and 100 µg/ml for 24 h). (C, D) Stimulation of BMDMs with 100 µg/ml of HDM induced phosphorylation of p38 and ERK in a time-dependent manner (0, 2, 4, 8, 12, 24 h).
